# Supplementary material for: Design, synthesis and antitubercular evaluation of benzothiazinones containing an oximido or amino nitrogen heterocycle moiety
Source: Royal Society of Chemistry journal article supplement (doi:10.1039/c6ra25712g), 2017-01-01
Supplement: c6ra25712g1.pdf [file c6ra25712g1.pdf]

### Supporting information

Melting points were determined in open capillaries and are uncorrected. <sup>1</sup>H NMR spectra were determined on a Varian Mercury-400 spectrometer in DMSO-*d*<sub>6</sub> or CDCl<sub>3</sub> using tetramethylsilane as an internal standard. Electrospray ionization (ESI) mass spectra and high resolution mass spectra (HRMS) were obtained on an MDSSCIEX Q-Tap mass spectrometer. Fast Atom Bombardment (FAB) mass spectra and high resolution mass spectra (HRMS) were obtained on a MICROMASS AutoSpec Ultima-TOF mass spectrometer. The reagents were all of analytical grade or chemically pure. TLC was performed on silica gel plates (Merck, ART5554 60F254).

#### 1. General procedure for the preparation of 3a-i

A mixture of piperidones **1a-i** (5 mmol), K<sub>2</sub>CO<sub>3</sub> (829 mg, 6 mmol) and alkoxyaminehydrochloride/hydroxylamine hydrochloride (6 mmol) in EtOH (20 mL) was stirred for 0.5-3h at room temperature, filtered, and concentrated under reduced pressure to give crude products **2a-i** as off-white or yellow oils.

To a solution of above **2a-i** in dichloromethane (5 mL) was added dropwise a solution of trifluoroacetic acid (10 mL) in dichloromethane (5 mL), stirred for 0.5 h, and concentrated under reduced pressure. The residue was purified by silica gel column chromatography to get **3a-i** as yellow oils (40-65%).

#### 2. General procedure for the preparation of 6a, b

A mixture of **4a, b** (3 mmol), (bromomethyl)cyclohexane (1.28 g, 7.2 mmol) and potassium carbonate (498 mg, 3.6 mmol) in DMF (8 mL) was stirred at 80 °C for 5h, poured into water (30 ml), and filtered. The filtrate was concentrated under reduced pressure to give crude products **5a, b** as yellow oils.

To a stirred solution of above **5a, b** in DCM (10 mL) was added dropwise a solution of trifluoroacetic acid (10 mL) in dichloromethane (5 mL) at room temperature. The mixture was stirred for 0.5 h at the same temperature, and concentrated under reduced pressure. The residue was purified by chromatography on silica gel column to get **6a, b** as yellow oils (50-52%).

#### 3. General procedure for the preparation of 10a-i and 11a, b

A mixture of **9** (322 mg, 1 mol) and triethylamine (0.17 mL, 1.2 mol) in EtOH (10 mL) was added dropwise a solution of **3a-i** or **6a, b** in EtOH (5 mL), stirred at 60 °C for 1 h, concentrated under reduced pressure. The residue was purified by chromatography on silica gel column to get the targeted compounds **10a-i** and **11a, b** as yellow solids (45 – 59%).

##### 3.1 2-(3-(methoxyimino)azetidin-1-yl)-8-nitro-6-(trifluoromethyl)-4H-benzo [e][1,3]thiazin-4-one 10a

The title compound **10a** was obtained from **3a** and **9** (59%), mp: 146-147 °C, <sup>1</sup>H NMR (500 MHz, CDCl<sub>3</sub>) δ 9.18-9.16 (m, 1H), 8.83-8.81 (m, 1H), 5.15-5.01 (m, 4H), 3.95 (s, 3H); <sup>13</sup>C NMR (150 MHz, DMSO-*d*<sub>6</sub>) δ 167.65, 165.29, 154.16, 145.38, 144.42, 134.69, 132.58, 132.29, 129.49, 129.26, 127.57, 126.70, 126.28, 121.49, 62.48; MS-ESI (m/z): 375.6 (M+H)<sup>+</sup>.

### **3.2 2-(3-(ethoxyimino)azetididin-1-yl)-8-nitro-6-(trifluoromethyl)-4H-benzo[e][1,3]thiazin-4-one 10b**

The title compound **10b** was obtained from **3b** and **9** (55%), mp : 151-152 °C. <sup>1</sup>H NMR (500 MHz, CDCl<sub>3</sub>) δ 9.18-9.16 (m, 1H), 8.82-8.80 (m, 1H), 5.13-5.01 (m, 4H), 4.20-4.15 (q, *J* = 7.0 Hz, 4H), 1.32-1.27 (t, *J* = 7.0 Hz, 3H); MS-ESI (m/z): 390.9 (M+H)<sup>+</sup>.

### **3.3 2-(3-((benzyloxy)imino)azetididin-1-yl)-8-nitro-6-(trifluoromethyl)-4H-benzo[e][1,3]thiazin-4-one 10c**

The title compound **10c** was obtained from **3c** and **9** (53%), mp: 182-184 °C. <sup>1</sup>H NMR (500 MHz, CDCl<sub>3</sub>) δ 9.17-9.15 (m, 1H), 8.81-8.79 (m, 1H), 7.38-7.31 (m, 5H), 5.20 (s, 2H), 5.15-5.03 (m, 4H); MS-ESI (m/z): 451.4 (M+H)<sup>+</sup>.

### **3.4 2-(3-(methoxyimino)pyrrolidin-1-yl)-8-nitro-6-(trifluoromethyl)-4H-benzo[e][1,3]thiazin-4-one 10d**

The title compound **10d** was obtained from **3d** and **9** (55%), mp: 171-168 °C, <sup>1</sup>H NMR (500 MHz, CDCl<sub>3</sub>) δ 9.20-9.16 (m, 1H), 8.83-8.80 (m, 1H), 4.66-4.59 (m, 1H), 4.46-4.43 (m, 1H), 4.24-4.20 (m, 1H), 4.02-3.98 (m, 1H), 3.97-3.90 (m, 3H), 3.08-3.02 (m, 1H), 2.94-2.88 (m, 1H); MS-ESI (m/z): 389.5 (M+H)<sup>+</sup>.

### **3.5 2-(4-(methoxyimino)piperidin-1-yl)-8-nitro-6-(trifluoromethyl)-4H-benzo[e][1,3]thiazin-4-one 10e**

The title compound **10e** was obtained from **3e** and **9** (55%), mp: 127-129 °C. <sup>1</sup>H NMR (500 MHz, CDCl<sub>3</sub>) δ 9.13-9.11 (m, 1H), 8.79-8.77 (m, 1H), 4.35-4.10 (m, 2H), 4.09-3.92 (m, 2H), 3.90-3.86 (m, 3H), 2.82-2.72 (m, 2H), 2.70-2.58 (m, 2H); MS-ESI (m/z): 403.5 (M+H)<sup>+</sup>.

### **3.6 2-(4-(ethoxyimino)piperidin-1-yl)-8-nitro-6-(trifluoromethyl)-4H-benzo[e][1,3]thiazin-4-one 10f**

The title compound **10f** was obtained from **3f** and **9** (54%), mp: 130-131 °C. <sup>1</sup>H NMR (500 MHz, CDCl<sub>3</sub>) δ 9.13-9.11 (m, 1H), 8.79-8.77 (m, 1H), 4.30-4.15 (m, 2H), 4.14-4.08 (q, *J* = 7.5 Hz, 4H), 4.05-3.91 (m, 2H), 2.85-2.73 (m, 2H), 2.70-2.55 (m, 2H), 1.29-1.25 (t, *J* = 7.5 Hz, 3H); MS-ESI (m/z): 417.5 (M+H)<sup>+</sup>.

### **3.7 2-(4-((benzyloxy)imino)piperidin-1-yl)-8-nitro-6-(trifluoromethyl)-4H-benzo[e][1,3]thiazin-4-one 10g**

The title compound **10g** was obtained from **3g** and **9** (59%), mp: 160-162 °C. <sup>1</sup>H NMR (500 MHz, CDCl<sub>3</sub>) δ 9.13-9.10 (m, 1H), 8.80-8.76 (m, 1H), 7.38-7.31 (m, 5H), 5.10 (s, 2H), 4.30-4.15 (m, 2H), 4.12-3.90 (m, 2H), 2.88-2.78 (m, 2H), 2.70-2.58 (m, 2H); MS-ESI (m/z): 479.2 (M+H)<sup>+</sup>.

### **3.8 2-(4-((benzyloxy)imino)azepan-1-yl)-8-nitro-6-(trifluoromethyl)-4H-benzo[e][1,3]thiazin-4-one 10h**

The title compound **10h** was obtained from **3h** and **9** (56%), mp: 126-129 °C. <sup>1</sup>H NMR (500 MHz, CDCl<sub>3</sub>) δ 9.18-9.16 (m, 1H), 8.82-8.80 (m, 1H), 4.20-4.11 (m, 2H), 4.05-4.01 (m, 1H), 3.96-3.92 (m, 1H), 3.82-3.77 (m, 3H), 3.00-

2.89 (m, 1H), 2.70-2.58 (m, 2H), 2.04-1.91 (m, 2H), 1.65-1.54 (m, 1H); MS-ESI (m/z): 417.7 (M+H)<sup>+</sup>.

**3.9 2-(3-amino-4-(methoxyimino) piperidin-1-yl)-8-nitro-6-(trifluoromethyl)- 4H-benzo[e][1,3]thiazin-4-one 10i**

The title compound **11i** was obtained from **3i** and **9** (55%), mp: 180-181 °C. <sup>1</sup>H NMR (500 MHz, CDCl<sub>3</sub>) δ 9.09-9.07 (m, 1H), 8.80-8.78 (m, 1H), 4.88-4.82 (m, 1H), 3.97-3.94 (m, 1H), 3.93-3.91 (m, 3H), 3.90-3.88 (m, 1H), 3.29-3.21 (m, 2H), 2.79-2.71 (m, 1H), 2.62-2.55 (m, 1H), 2.01-1.95 (m, 1H); MS-ESI (m/z): 418.9 (M+H)<sup>+</sup>.

**3.10 2-(3-((cyclohexylmethyl)(methyl)amino)pyrrolidin-1-yl)-8-nitro-6-(trifluoro methyl)-4H-benzo[e][1,3]thiazin-4-one 11a**

The title compound **11a** was obtained from **6a** and **9** (45%), mp: 126-129 °C. <sup>1</sup>H NMR (500 MHz, CDCl<sub>3</sub>) δ 9.18-9.16 (m, 1H), 8.79-8.77 (m, 1H), 4.32-4.21 (m, 3H), 4.15-4.02 (m, 2H), 3.93-3.85 (m, 3H), 3.75-3.65 (m, 2H), 1.82-1.70 (m, 5H), 1.64-1.55 (m, 3H), 1.25-1.16 (m, 5H); <sup>13</sup>C NMR (125 MHz, CDCl<sub>3</sub>) δ 166.03, 165.99, 160.76, 160.65, 143.59 (s, 7H), 134.48, 133.88, 131.91, 131.16, 130.95, 128.90, 126.82, 126.76, 125.97, 123.49, 121.31, 65.60, 64.46, 62.90, 62.78, 52.70, 49.16, 46.30, 40.09, 31.72, 31.62, 30.57, 29.72, 26.04; MS-ESI (m/z): 471.5 (M+H)<sup>+</sup>.

**3.11 2-(4-((cyclohexylmethyl)(methyl)amino)piperidin-1-yl)-8-nitro-6-(trifluoromethyl)-4H-benzo[e][1,3]thiazin-4-one 11b**

The title compound **11b** was obtained from **6b** and **9** (52%), mp: 146-149 °C. <sup>1</sup>H NMR (500 MHz, CDCl<sub>3</sub>) δ 8.99-8.97 (m, 1H), 8.72-8.69 (m, 1H), 4.12-4.02 (m, 1H), 3.16-3.14 (m, 1H), 2.94-2.85 (m, 3H), 2.82-2.70 (m, 2H), 2.65-2.39 (m, 5H), 1.90-1.70 (m, 7H), 1.68-1.62 (m, 1H), 1.32-1.23 (m, 2H), 1.17-1.10 (m, 1H), 1.03-0.96 (m, 2H); <sup>13</sup>C NMR (150 MHz, CDCl<sub>3</sub>) δ 166.50, 161.51, 143.87, 134.24, 133.28, 133.26, 129.63, 129.40, 126.62, 129.54, 129.51, 123.25, 121.44, 60.78, 60.54, 46.29, 38.65, 36.17, 31.76, 26.76, 26.08; MS-ESI (m/z): 485.5 (M+H)<sup>+</sup>.
